# Supplementary material for: The Chromatin Structure of CRISPR-Cas9 Target DNA Controls the Balance between Mutagenic and Homology-Directed Gene-Editing Events
Source: PubMed Central journal article supplement — Mol Ther Nucleic Acids. 2019 Feb 20;16:141–54. doi: 10.1016/j.omtn.2019.02.009 (PMC6424062; doi:10.1016/j.omtn.2019.02.009), 2019-02-20
Supplement: mmc1.pdf [file mmc1.pdf]

OMTN, Volume 16

## **Supplemental Information**

### **The Chromatin Structure of CRISPR-Cas9 Target DNA Controls the Balance between Mutagenic and Homology-Directed Gene-Editing Events**

**Josephine M. Janssen, Xiaoyu Chen, Jin Liu, and Manuel A.F.V. Gonçalves**

## SUPPLEMENTAL INFORMATION

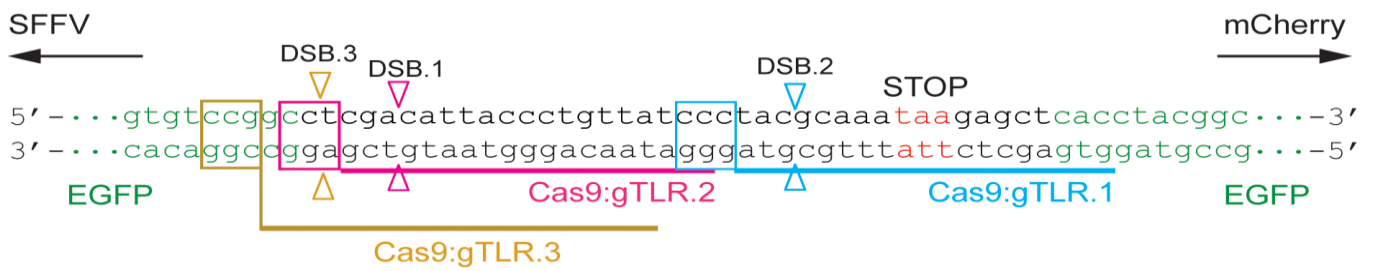

**Figure S1. Target sites of RGN complexes in the *TLR* construct.** The target sequences for the RGN complexes Cas9:gTLR.1, Cas9:gTLR.2 and Cas9:gTLR.3 are indicated by horizontal lines linked to open boxes delimiting the respective PAM sequences. The positions of the site-specific DSBs generated by each RGN are marked (vertical open arrowheads). STOP, nonsense codon located within the *TLR* ORF.

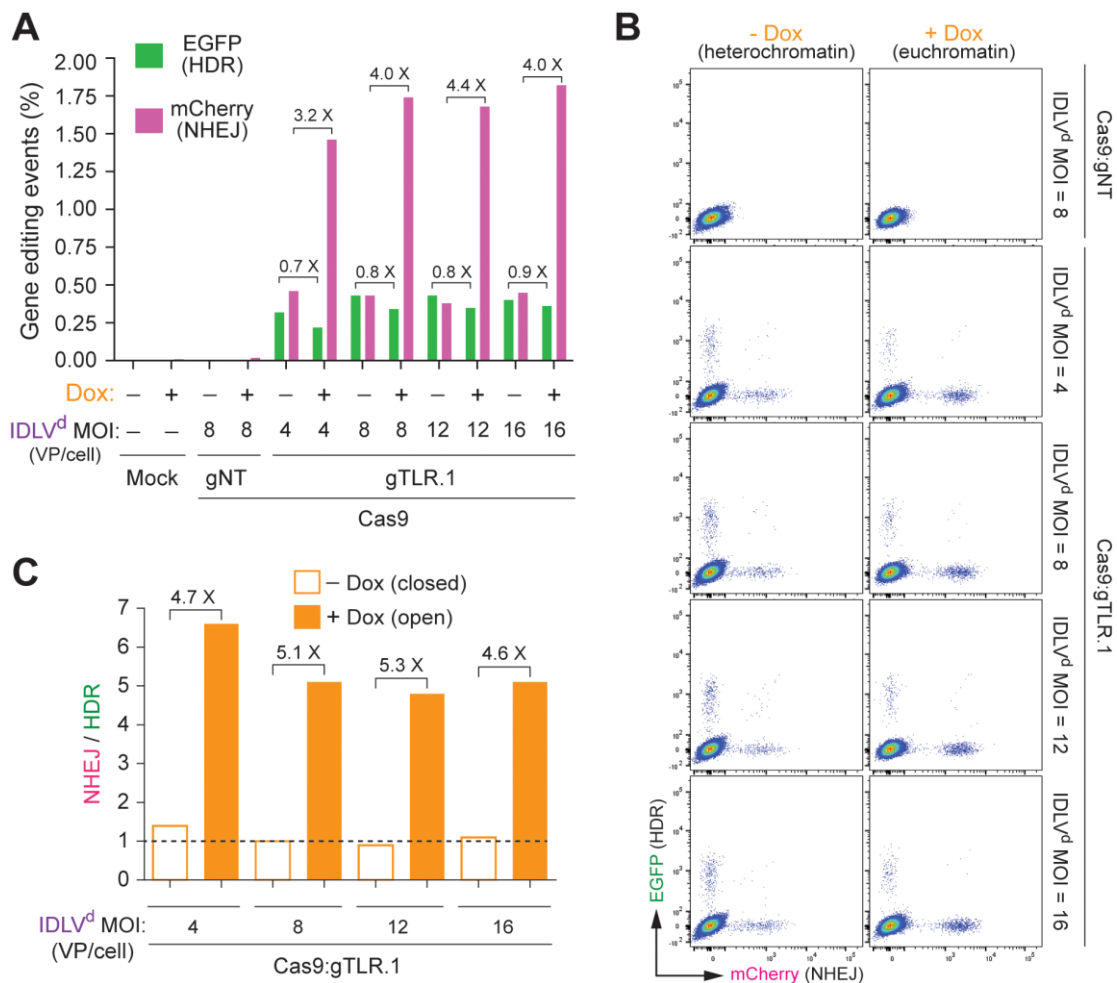

**Figure S2. Gene editing endpoints at euchromatin versus heterochromatin after IDLV donor DNA delivery.** (A) Dual-color flow cytometric quantification of HDR and NHEJ events in HER.TLR<sup>TetO.KRAB</sup> cells. HER.TLR<sup>TetO.KRAB</sup> cells were exposed to Cas9:gTLR.1 together with the indicated multiplicities of infection (MOI) of IDLV<sup>d</sup>. Negative controls consisted of mock-treated cultures and of cultures exposed to a non-targeting gRNA (gNT), Cas9 and IDLV<sup>d</sup> at an MOI of 8 vector particles per cell (VP/cell). The various experimental conditions were tested in HER.TLR<sup>TetO.KRAB</sup> reporter cells incubated in the absence (-) or in the presence (+) of doxycycline (Dox). The frequencies of HDR and NHEJ events in the various target cell populations were determined by measuring EGFP<sup>+</sup> and mCherry<sup>+</sup> cells, respectively. (B) Dot plots corresponding to HER.TLR<sup>TetO.KRAB</sup> cells transduced with different doses of IDLV<sup>d</sup> particles and subjected to the indicated Dox regimens. (C) Relative participation of HDR and NHEJ pathways during IDLV-mediated repair of DSBs occurring at heterochromatin versus euchromatin. Data of panel A are presented as the ratios between the frequencies of NHEJ and HDR in HER.TLR<sup>TetO.KRAB</sup> cells not treated and treated with Dox.

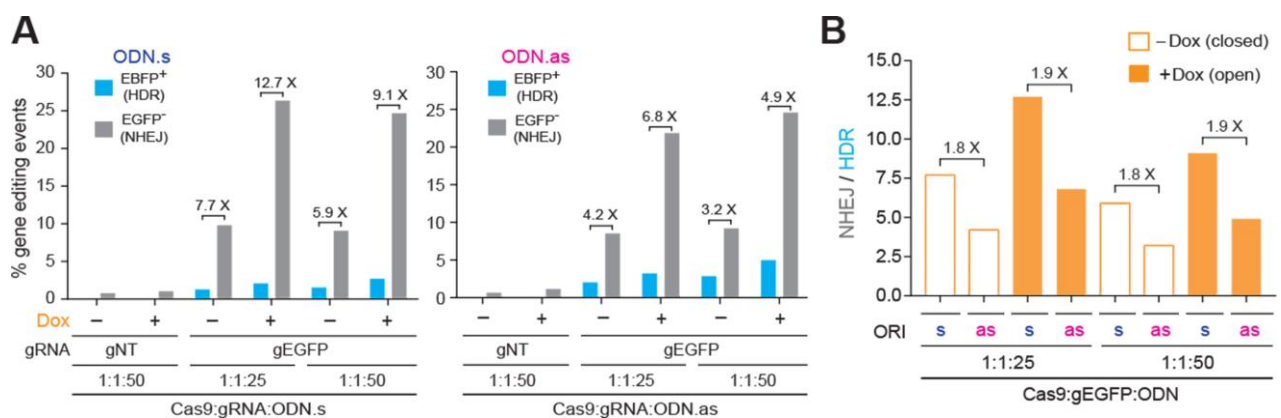

**Figure S3. Gene editing endpoints at euchromatin versus heterochromatin in HEK.EGFP<sup>TetO.KRAB</sup> cells after transfection of ODNs with different polarities.** (A) Testing the impact of chromatin structure on HDR-based gene editing with sense and antisense ODNs. HEK.EGFP<sup>TetO.KRAB</sup> cells, incubated (+) or not incubated (-) with Dox, were exposed to the indicated experimental conditions. The frequencies of HDR and NHEJ were assessed by dual-color flow cytometry. (B) Relative participation of HDR and NHEJ pathways during the repair of euchromatic versus heterochromatic DSBs with ODNs with different polarities. Data of panel A displayed as the ratios between the

frequencies of NHEJ and HDR in HEK.EGFP<sup>TetO.KRAB</sup> cells treated and not treated with Dox.

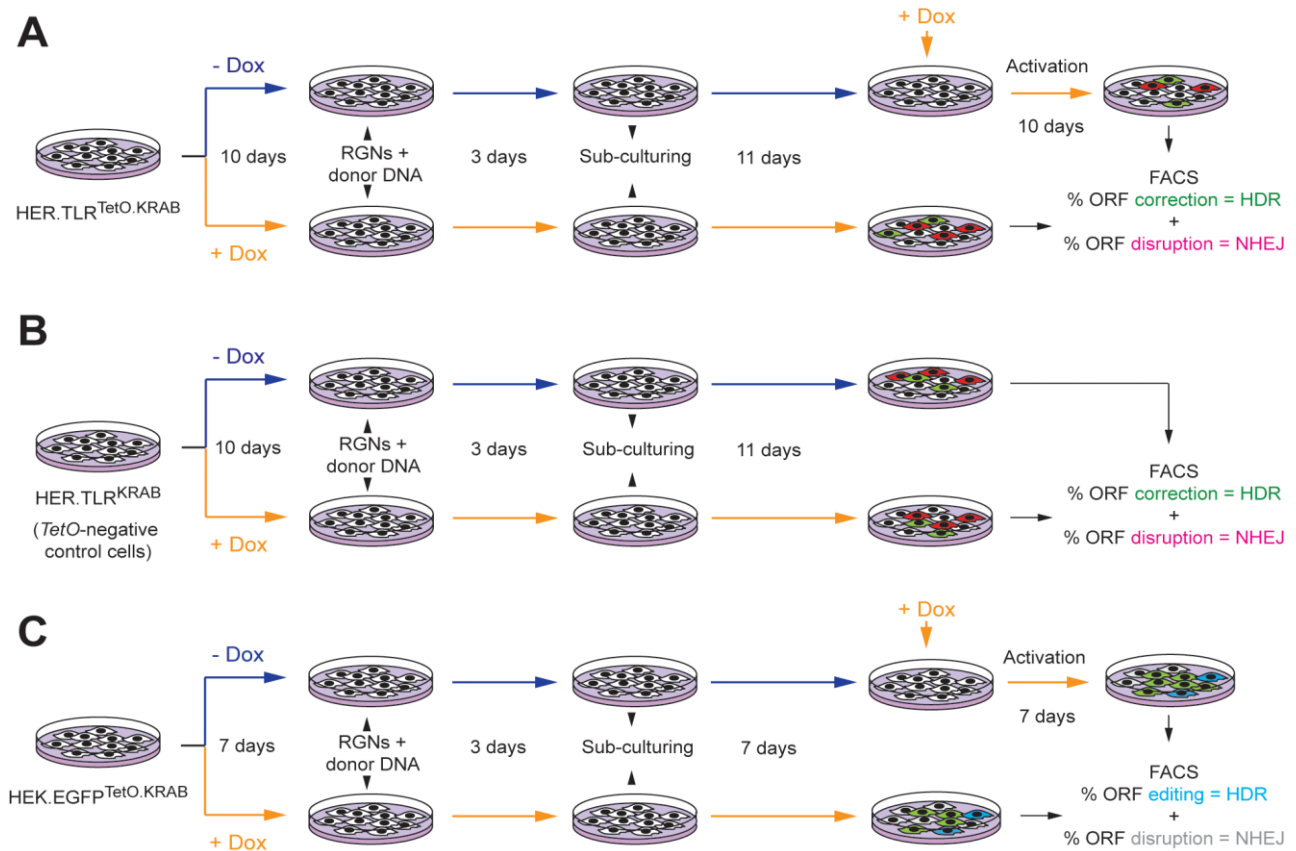

**Figure S4. Schematic representation of the experimental settings used in the current study.** The tTR-KRAB-expressing cells HER.TLR<sup>TetO.KRAB</sup> (A) contain the Dox-regulated *TLR*<sup>TetO</sup> construct. The tTR-KRAB-expressing HER.TLR<sup>KRAB</sup> reporter cells (B) have the Dox-insensitive *TLR* construct and were used as an isogenic control cellular system. The tTR-KRAB-expressing cells HEK.EGFP<sup>TetO.KRAB</sup> (C) contain the Dox-regulated *EGFP*<sup>TetO</sup> construct. These reporter cells are transiently transfected in the presence or in the absence of Dox with different combinations of gene editing tools consisting of RGNs and donor DNA templates. After the generation of site-specific DSBs and the ensuing modification of target DNA sequences in cells subjected to both experimental settings (i.e. -Dox and +Dox), target gene expression is activated to quantifying by flow cytometry the frequencies of gene editing events resulting from the engagement of HDR and NHEJ pathways.

**Table S1.** Oligonucleotide pairs to generate the gRNA expression constructs expressing gTLR.1, gTLR.2, gTLR.3, gNT and gEGFP

| Plasmids    | Oligonucleotide pairs (5' - 3')                                                     |
|-------------|-------------------------------------------------------------------------------------|
| Z42_pgTLR.1 | 5' -ACCGGTGAGCTCTTATTTGCGTA-3'<br>5' -AAACTACGCAAATAAGAGCTCAC-3'                    |
| Z44_pTLR.2  | 5' -ACCGGGATAACAGGGTAATGTTCG-3'<br>5' -AAACCGACATTACCCTGTTATCC-3'                   |
| AW26_pTLR.3 | 5' -ACCGTAACAGGGTAATGTTCGAGGC-3'<br>5' -AAACGCCTCGACATTACCCTGTTA-3'                 |
| AM51_pgNT   | 5' -ACCGGTGAGCTCTTATTTGCGTAGCTAGCTGAC-3<br>5' -AAACGTCAGCTAGCTACGCAAATAAGAGCTCAC-3' |
| AX03_pgEGFP | 5' -ACCGCTCGTGACCACCTGACCTA-3'<br>5' -AAACTAGGTCAGGGTGGTCACGAG-3'                   |

**Table S2.** Experimental scheme corresponding to **Figure S2**

|                             |                                                                                                                                  |            |            |             |
|-----------------------------|----------------------------------------------------------------------------------------------------------------------------------|------------|------------|-------------|
| DONOR:<br>IDLV <sup>d</sup> | 3.25 ×10 <sup>5</sup> HER.TLR <sup>TetO.KRAB</sup> cells per well of 24-well plates (500 µl medium per well with or without Dox) |            |            |             |
|                             | <b>PEI (1mg/ml): 5.8 µl per well; Ratio DNA / PEI equivalents = 6</b>                                                            |            |            |             |
| Reagents                    | Cas9                                                                                                                             | gNT (Ctrl) | gTLR.1     | Total       |
| Construct length<br>(bp)    | 9551                                                                                                                             | 3056       | 3046       | (ng)        |
| DNA per well<br>(ng)        | <b>1327</b>                                                                                                                      | <b>423</b> |            | <b>1750</b> |
|                             | <b>1327</b>                                                                                                                      |            | <b>423</b> | <b>1750</b> |
|                             | <b>1327</b>                                                                                                                      |            |            | <b>1750</b> |

**Note 1:** One day after transfecting plasmids expressing Cas9 and gTLR.1, IDLV<sup>d</sup> particles were added at an MOI of 4, 8, 12 and 16 VP/cell; **Note 2:** One day after transfecting plasmids expressing Cas9 and gRNA<sup>NT</sup>, IDLV<sup>d</sup> particles were added at an MOIs of 8 VP/cell.

**Table S3.** Experimental scheme corresponding to **Figure 2 (Protocol A)**

|                             |                                                                                                                                  |            |            |             |
|-----------------------------|----------------------------------------------------------------------------------------------------------------------------------|------------|------------|-------------|
| DONOR:<br>IDLV <sup>d</sup> | 3.25 ×10 <sup>5</sup> HER.TLR <sup>TetO.KRAB</sup> cells per well of 24-well plates (500 µl medium per well with or without Dox) |            |            |             |
|                             | <b>PEI (1mg/ml): 9.6 µl per well; Ratio DNA / PEI equivalents = 10</b>                                                           |            |            |             |
| Reagents                    | Cas9                                                                                                                             | gNT (Ctrl) | gTLR.1     | Total       |
| Construct length<br>(bp)    | 9551                                                                                                                             | 3056       | 3046       | (ng)        |
| DNA per well<br>(ng)        | <b>1327</b>                                                                                                                      | <b>423</b> |            | <b>1750</b> |
|                             | <b>1327</b>                                                                                                                      |            | <b>423</b> | <b>1750</b> |
|                             | <b>1327</b>                                                                                                                      |            |            | <b>1750</b> |

**Note:** One day after transfection of the indicated plasmids, IDLV<sup>d</sup> particles were added at an MOI of 8 VP/cell.

**Table S4.** Experimental scheme corresponding to **Figure 2 (Protocol B)**

|                             |                                                                                                                                   |            |            |            |               |
|-----------------------------|-----------------------------------------------------------------------------------------------------------------------------------|------------|------------|------------|---------------|
| DONOR:<br>IDLV <sup>d</sup> | 3.25 × 10 <sup>5</sup> HER.TLR <sup>TetO.KRAB</sup> cells per well of 24-well plates (500 µl medium per well with or without Dox) |            |            |            |               |
|                             | <b>PEI (1mg/ml): 5.8 µl per well; Ratio DNA / PEI equivalents = 6</b>                                                             |            |            |            |               |
| Reagents                    | Cas9                                                                                                                              | gNT (Ctrl) | gTLR.1     | gTLR.2     | Total<br>(ng) |
| Construct length<br>(bp)    | 9551                                                                                                                              | 3056       | 3046       | 3046       |               |
| DNA per well<br>(ng)        | <b>1327</b>                                                                                                                       | <b>423</b> |            |            | <b>1750</b>   |
|                             | <b>1327</b>                                                                                                                       |            | <b>423</b> |            | <b>1750</b>   |
|                             | <b>1327</b>                                                                                                                       |            |            | <b>423</b> | <b>1750</b>   |

**Note:** One day after transfecting the indicated plasmids, IDLV<sup>d</sup> particles were added at an MOI of 8 VP/cell.

**Table S5.** Experimental scheme corresponding to **Figure 3 (Protocol A)**

|                                |                                                                                                                                   |            |            |            |            |                      |               |
|--------------------------------|-----------------------------------------------------------------------------------------------------------------------------------|------------|------------|------------|------------|----------------------|---------------|
| DONOR:<br>Plasmid <sup>d</sup> | 3.25 × 10 <sup>5</sup> HER.TLR <sup>TetO.KRAB</sup> cells per well of 24-well plates (500 µl medium per well with or without Dox) |            |            |            |            |                      |               |
|                                | <b>PEI (1mg/ml): 9.6 µl per well; Ratio DNA / PEI equivalents = 10</b>                                                            |            |            |            |            |                      |               |
| Reagents                       | Cas9                                                                                                                              | gNT (Ctrl) | gTLR.1     | gTLR.2     | gTLR.3     | Plasmid <sup>d</sup> | Total<br>(ng) |
| Construct length<br>(bp)       | 9551                                                                                                                              | 3056       | 3046       | 3046       | 3047       | 6194                 |               |
| DNA per well<br>(ng)           | <b>890</b>                                                                                                                        | <b>284</b> |            |            |            | <b>577</b>           | <b>1751</b>   |
|                                | <b>890</b>                                                                                                                        |            | <b>284</b> |            |            | <b>577</b>           | <b>1751</b>   |
|                                | <b>890</b>                                                                                                                        |            |            | <b>284</b> |            | <b>577</b>           | <b>1751</b>   |
|                                | <b>890</b>                                                                                                                        |            |            |            | <b>284</b> | <b>577</b>           | <b>1751</b>   |

**Note:** The same transfection conditions were applied in experiments carried out in control, Dox-unresponsive, HER.TLR<sup>KRAB</sup> cells (**Figure 4**).

**Table S6.** Experimental scheme corresponding to **Figure 3 (Protocol B)**

|                                |                                                                                                                                   |            |            |            |                      |               |
|--------------------------------|-----------------------------------------------------------------------------------------------------------------------------------|------------|------------|------------|----------------------|---------------|
| DONOR:<br>Plasmid <sup>d</sup> | 3.25 × 10 <sup>5</sup> HER.TLR <sup>TetO.KRAB</sup> cells per well of 24-well plates (500 µl medium per well with or without Dox) |            |            |            |                      |               |
|                                | <b>PEI (1mg/ml): 5.8 µl per well; Ratio DNA / PEI equivalents = 6</b>                                                             |            |            |            |                      |               |
| Reagents                       | Cas9                                                                                                                              | gNT (Ctrl) | gTLR.1     | gTLR.2     | Plasmid <sup>d</sup> | Total<br>(ng) |
| Construct length<br>(bp)       | 9551                                                                                                                              | 3056       | 3046       | 3046       | 6194                 |               |
| DNA per well<br>(ng)           | <b>890</b>                                                                                                                        | <b>284</b> |            |            | <b>577</b>           | <b>1751</b>   |
|                                | <b>890</b>                                                                                                                        |            | <b>284</b> |            | <b>577</b>           | <b>1751</b>   |
|                                | <b>890</b>                                                                                                                        |            |            | <b>284</b> | <b>577</b>           | <b>1751</b>   |

**Table S7. Experimental scheme corresponding to Figure 6**

| DONOR:<br>Plasmid <sup>d</sup> |            | 3.25 × 10 <sup>5</sup> HER.TLR <sup>TetO.KRAB</sup> cells per well of 24-well plates (500 µl medium per well with or without Dox) |            |            |            |                      |                      | Total<br>(ng) |
|--------------------------------|------------|-----------------------------------------------------------------------------------------------------------------------------------|------------|------------|------------|----------------------|----------------------|---------------|
|                                |            | <b>PEI (1mg/ml): 9.6 µl per well; Ratio DNA / PEI equivalents = 10</b>                                                            |            |            |            |                      |                      |               |
| Reagents                       | Cas9       | gNT (Ctrl)                                                                                                                        | gTLR.1     | gTLR.2     | gTLR.3     | Plasmid <sup>d</sup> | Plasmid <sup>S</sup> |               |
| Construct length (bp)          | 8506       | 3056                                                                                                                              | 3046       | 3046       | 3047       | 6194                 | 6040                 |               |
| DNA per well (ng)              | <b>823</b> | <b>295</b>                                                                                                                        |            |            |            | <b>599</b>           | <b>33</b>            | <b>1750</b>   |
|                                | <b>823</b> |                                                                                                                                   | <b>295</b> |            |            | <b>599</b>           | <b>33</b>            | <b>1750</b>   |
|                                | <b>823</b> |                                                                                                                                   |            | <b>295</b> |            | <b>599</b>           | <b>33</b>            | <b>1750</b>   |
|                                | <b>823</b> |                                                                                                                                   |            |            | <b>295</b> | <b>599</b>           | <b>33</b>            | <b>1750</b>   |

| DONOR:<br>Plasmid <sup>d</sup> |                             | 3.25 × 10 <sup>5</sup> HER.TLR <sup>TetO.KRAB</sup> cells per well of 24-well plates (500 µl medium per well with or without Dox) |            |            |            |                      |             | Total<br>(ng) |
|--------------------------------|-----------------------------|-----------------------------------------------------------------------------------------------------------------------------------|------------|------------|------------|----------------------|-------------|---------------|
|                                |                             | <b>PEI (1mg/ml): 9.6 µl per well; Ratio DNA / PEI equivalents = 10</b>                                                            |            |            |            |                      |             |               |
| Reagents                       | Cas9 <sup>hGem(1/110)</sup> | gNT (Ctrl)                                                                                                                        | gTLR.1     | gTLR.2     | gTLR.3     | Plasmid <sup>d</sup> |             |               |
| Construct length (bp)          | 8854                        | 3056                                                                                                                              | 3046       | 3046       | 3047       | 6194                 |             |               |
| DNA per well (ng)              | <b>856</b>                  | <b>295</b>                                                                                                                        |            |            |            | <b>599</b>           | <b>1751</b> |               |
|                                | <b>856</b>                  |                                                                                                                                   | <b>295</b> |            |            | <b>599</b>           | <b>1751</b> |               |
|                                | <b>856</b>                  |                                                                                                                                   |            | <b>295</b> |            | <b>599</b>           | <b>1751</b> |               |
|                                | <b>856</b>                  |                                                                                                                                   |            |            | <b>295</b> | <b>599</b>           | <b>1751</b> |               |

**Notes:** The source of Cas9 and Cas9<sup>hGem(1/110)</sup> proteins were isogenic expression plasmids pX330.Cas9 and pX330.Cas9.hGem(1/110), respectively; Plasmid<sup>S</sup> refers to an irrelevant (“stuffer”) construct to normalize the total amount of transfected DNA; The same transfection conditions were applied in experiments carried out in control, Dox-unresponsive, HER.TLR<sup>KRAB</sup> cells.

**Table S8. Experimental scheme corresponding to Figure 5**

| DONOR:<br>pTHG.Donor<br>(Exp.1) |            | 2.0 × 10 <sup>5</sup> HEK.EGFP <sup>TetO.KRAB</sup> cells per well of 24-well plates (500 µl medium per well with or without Dox) |            |            |             | Total<br>(ng) |
|---------------------------------|------------|-----------------------------------------------------------------------------------------------------------------------------------|------------|------------|-------------|---------------|
|                                 |            | <b>PEI (1mg/ml): 6.2 µl per well; Ratio DNA / PEI equivalents = 9</b>                                                             |            |            |             |               |
| Reagents                        | eCas9      | gEGFP                                                                                                                             | gNT (Ctrl) | pTHG.Donor |             |               |
| Construct length (bp)           | 9360       | 3046                                                                                                                              | 3056       | 3561       |             |               |
| DNA per well (ng)               | <b>733</b> | <b>238</b>                                                                                                                        |            | <b>279</b> | <b>1250</b> |               |
|                                 | <b>733</b> |                                                                                                                                   | <b>238</b> | <b>279</b> | <b>1250</b> |               |
| DONOR:<br>pTHG.Donor<br>(Exp.2) |            | 2.0 × 10 <sup>5</sup> HEK.EGFP <sup>TetO.KRAB</sup> cells per well of 24-well plates (500 µl medium per well with or without Dox) |            |            |             | Total<br>(ng) |
|                                 |            | <b>PEI (1mg/ml): 6.2 µl per well; Ratio DNA / PEI equivalents = 9</b>                                                             |            |            |             |               |
| Reagents                        | eCas9      | gEGFP                                                                                                                             | gNT (Ctrl) | pTHG.Donor |             |               |
| Construct length (bp)           | 9403       | 3046                                                                                                                              | 3056       | 3561       |             |               |
| DNA per well (ng)               | <b>733</b> | <b>238</b>                                                                                                                        |            | <b>279</b> | <b>1250</b> |               |
|                                 | <b>733</b> |                                                                                                                                   | <b>238</b> | <b>279</b> | <b>1250</b> |               |

**Table S9.** Experimental scheme corresponding to **Figure S3**

| DONOR:<br>ODN.s / ODN.as | 2.5 ×10 <sup>5</sup> HEK.EGFP <sup>TetO.KRAB</sup> cells per well of 24-well plates (500 µl medium per well with or without Dox) |            |            |            |            |               |                 |
|--------------------------|----------------------------------------------------------------------------------------------------------------------------------|------------|------------|------------|------------|---------------|-----------------|
|                          | <b>PEI (1mg/ml): 6.2 µl per well; Ratio DNA / PEI equivalents = 9</b>                                                            |            |            |            |            |               |                 |
| Reagents                 | Cas9                                                                                                                             | gNT (Ctrl) | gEGFP      | ODN.s      | ODN.as     | Total<br>(ng) | Molar<br>ratios |
| Construct length<br>(bp) | 9551                                                                                                                             | 3056       | 3046       | 120        | 120        |               |                 |
| DNA per well<br>(ng)     | <b>642</b>                                                                                                                       | <b>205</b> |            | <b>403</b> |            | <b>1250</b>   | <b>1:1:50</b>   |
|                          | <b>766</b>                                                                                                                       |            | <b>244</b> | <b>240</b> |            | <b>1250</b>   | <b>1:1:25</b>   |
|                          | <b>642</b>                                                                                                                       |            | <b>205</b> | <b>403</b> |            | <b>1250</b>   | <b>1:1:50</b>   |
|                          | <b>642</b>                                                                                                                       | <b>205</b> |            |            | <b>403</b> | <b>1250</b>   | <b>1:1:50</b>   |
|                          | <b>766</b>                                                                                                                       |            | <b>244</b> |            | <b>240</b> | <b>1250</b>   | <b>1:1:25</b>   |
|                          | <b>642</b>                                                                                                                       |            | <b>205</b> |            | <b>403</b> | <b>1250</b>   | <b>1:1:50</b>   |

**Table S10.** Experimental scheme corresponding to **Figure 7C**

| DONOR:<br>ODN.s / ODN.as | 2.5 ×10 <sup>5</sup> HEK.EGFP <sup>TetO.KRAB</sup> cells per well of 24-well plates (500 µl medium per well with or without Dox) |            |            |            |               |                 |  |
|--------------------------|----------------------------------------------------------------------------------------------------------------------------------|------------|------------|------------|---------------|-----------------|--|
|                          | <b>PEI (1mg/ml): 6.2 µl per well; Ratio DNA / PEI equivalents = 9</b>                                                            |            |            |            |               |                 |  |
| Reagents                 | Cas9                                                                                                                             | gNT (Ctrl) | gEGFP      | ODN.as     | Total<br>(ng) | Molar<br>ratios |  |
| Construct length<br>(bp) | 9551                                                                                                                             | 3056       | 3046       | 120        |               |                 |  |
| DNA per well<br>(ng)     | <b>642</b>                                                                                                                       | <b>205</b> |            | <b>403</b> | <b>1250</b>   | <b>1:1:50</b>   |  |
|                          | <b>766</b>                                                                                                                       |            | <b>244</b> | <b>240</b> | <b>1250</b>   | <b>1:1:25</b>   |  |
|                          | <b>642</b>                                                                                                                       |            | <b>205</b> | <b>403</b> | <b>1250</b>   | <b>1:1:50</b>   |  |
|                          | <b>553</b>                                                                                                                       |            | <b>176</b> | <b>521</b> | <b>1250</b>   | <b>1:1:75</b>   |  |

**Note:** The molar ratios 1:1:50 of Cas9:gRNA:oligos were used in the experiments corresponding to the flow cytometry dot plots presented in Figure 6B.



## Supplementary Notes

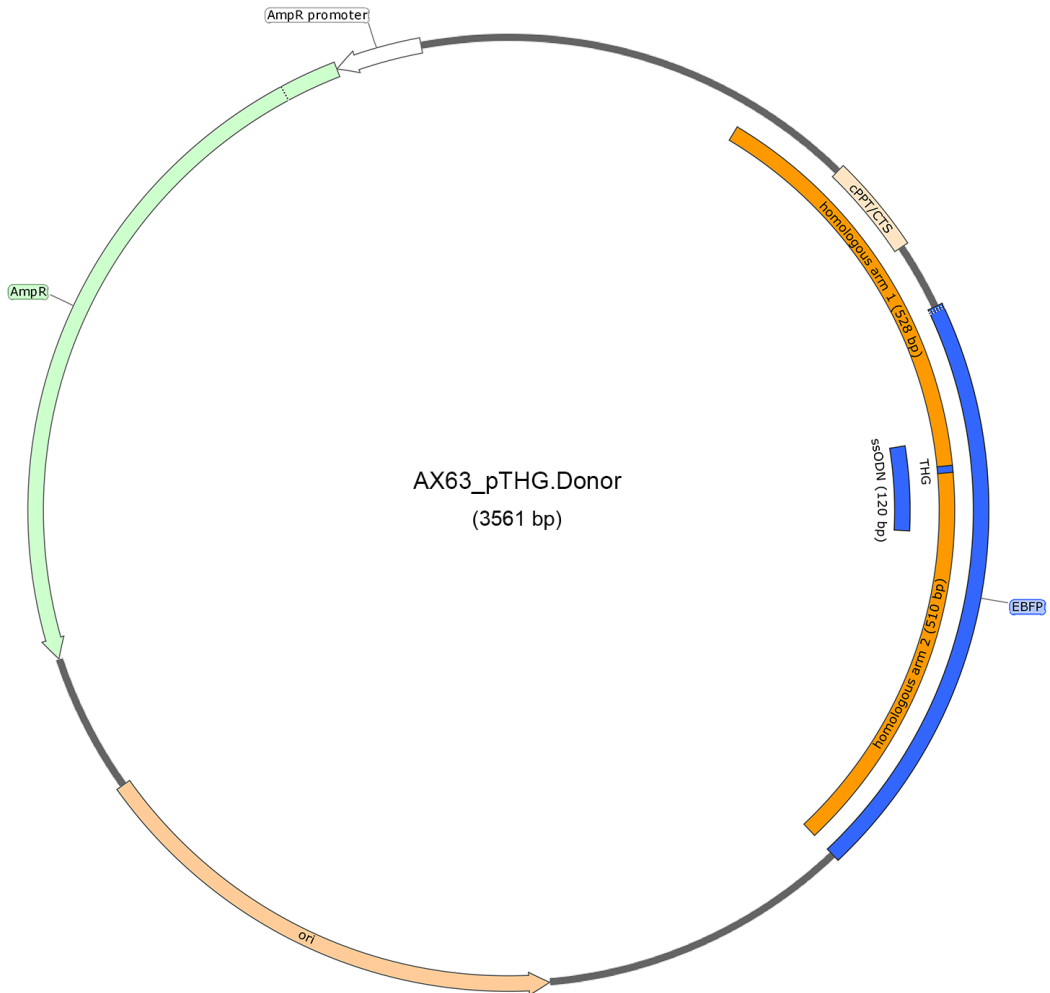

>AX63\_pTHG.Donor

```

GGAAACAGCTATGACCATGATTACGCCAAGCTCGAAATTACCCCTCACTAAAGGGAACAAAGCTGGTACGAGGACAGGCT
GGAGCCATGGGCATGGCTACTCAAGCTGATTTGATGGAGTTGGACATGGCCATGGCTGGTGACCACGTCGTGGAATGCCT
TCGAATTCAGCACCTGCACATGGGACGTCGACCTGAGGTAATTATAACCCGGGCCCTATATATGGATCCAATTGCAATGA
TCATCATGACAGATCTGCGCGGATCGATATCAGCGCTTTAAATTTGCGCATGCTAGCTATAGTTCTAGAGCCTCTGCTA
ACCATGTTTCATGCCTTCTTCTTTTCTACAGCTCCTGGCAACGTGCTGGTTATTGTGCTGTCTCATCATTTTGGCAAA
GAATTAATTTAATTAATCTCGACGGTATCGGTTAACTTTTAAAGAAAAGGGGGATTGGGGGTACAGTGCAGGGGAA
AGAATAGTAGACATAATAGCAACAGACATACAAATTTAAAGAATTACAAAAACAAATTACAAAAATTCAAAATTTATCG
ATCAGGACTAGCCTCGAGGTTTAAACTACGGGATCCAGGCCAAGCTTACGCGTCTAGCGCTACCGGTCGCCACCAT
GGTGAGCAAGGGCGAGGAGCTGTTACCCGGGTGGTGCCATCCTGGTTCGAGCTGGACGGCGACGTAAACGGCCACAAGT
TCAGCGTGTCCGGCGAGGGCGAGGGCGATGCCACCTACGGCAAGCTGACCTGAAGTTCATCTGCACCACCGGCAAGCTG
CCCGTGCCTTGCCACCCCTCGTGACCACCCTGACACATGGCGTGCAGTGTTCAGCCGCTACCCCGACCACATGAAGCA
GCACGACTTCTTCAAGTCCGCCATGCCCGAAGGCTACGTCCAGGAGCGCACCATCTTCTCAAGGACGACGGCAACTACA
AGACCCGCGCCGAGGTGAAGTTCGAGGGCGACACCTGGTGAACCGCATCGAGCTGAAGGCATCGACTTCAAGGAGGAC
GGCAACATCCTGGGGCACAAGCTGGAGTACAAC TACAACAGCCACAACGCTTATATCATGGCCACAAGCAGAAGAACGG
  
```

CATCAAGGTGAACCTCAAGATCCGCCACAACATCGAGGACGGCAGCGTGCAGCTCGCCGACCCTACCAGCAGAACACCC  
CCATCGGCGACGGCCCCGTGCTGCTGCCGACAACCCTACCTGAGCACCAGTCCGCCCTGAGCAAAGACCCCAACGAG  
AAGCGCGATCACATGGTCTGCTGGAGTTCGTGACCGCCCGGGATCACTCTCGGCATGGACGAGCTGTACAGAGCTCG  
AGAAGTACTAGTGGCCACGTGGGCGTGCACCTTAAGCTTTTAAATAAGGAGGAATAACATATGACCATGATTACGCCAA  
GCTCCAATTCGCCCTATAGTGAGTTCGTATTACAATTCACCTGGCCGTCGTTTACTATGCGGTGTGAAATACCGCACAGAT  
GCGTAAGGAGAAAATACCGCATCAGGCGCTCTCCGCTTCCTCGCTCACTGACTCGCTGCGCTCGGTCGTTTCGGCTGCGG  
CGAGCGGTATCAGTCACTCAAAGGCGGTAATACGGTTATCCACAGAATCAGGGGATAACGCAGGAAAGAACATGTGAGC  
AAAAGGCCAGCAAAGGCCAGGAACCGTAAAAAGGCCGCGTTGCTGGCCTTTTTCCATAGGCTCCGCCCCCTGACGAGC  
ATCAAAAAATCGACGCTCAAGTCAGAGGTGGCGAAACCCGACAGGACTATAAAGATACCAGGCGTTTCCCCCTGGAAGC  
TCCCTCGTGCCTCTCCTGTTCCGACCTGCGGCTTACCGGATACCTGTCCGCTTTTCCCTTCGGGAAGCGTGGCGCT  
TTTCATAGCTCAGCTGTAGGTATCTCAGTTCGGTGTAGGTGCTTCGCTCCAAGCTGGGCTGTGTGCACGAACCCCCG  
TTCAGCCGACCGTGCCTTATCCGGTAACTATCGTCTTGTAGTCCAACCCGTAAGACACGACTTATCGCCACTGGCA  
GCAGCCACTGGTAACAGGATTAGCAGAGCGAGGTATGTAGGCGGTGCTACAGAGTCTTGAAGTGGTGGCCTAACTACGG  
CTACACTAGAAGGACAGTATTTGGTATCTGCGCTCTGCTGAAGCCAGTTACCTTCGGAAAAAGAGTTGGTAGCTCTTGAT  
CCGGCAAACAAACCACCGTGGTAGCGGTGGTTTTTTTTGTTGCAAGCAGCAGATTACGCGCAGAAAAAAGGATCTCAA  
GAAGATCCTTTGATCTTTTCTACGGGCTGACGCTCAGTGAACGAAAACCTCACGTTAAGGGATTTTGGTCATGAGATT  
ATCAAAAAGGATCTCACCTAGATCCTTTTAAATTAATAAAGTAAAGTAAATCAATCTAAAGTATATATGAGTAACTT  
GGTCTGACAGTTACCAATGCTTAATCAGTGAGGCACCTATCTCAGCGATCTGTCTATTTTCGTTTCATCCATAGTTGCCTGA  
CTCCCCGTCGTGTAGATAACTACGATACGGGAGGCTTACCATCTGGCCCCAGTCTGCAATGATACCGCGAGACCCACG  
CTCACCGGCTCCAGATTTATCAGCAATAAACAGCCAGCCGGAAGGGCCGAGCGCAGAAGTGGTCTGCAACTTTTATCCG  
CCTCCATCCAGTCTATTAATTGTTGCCGGAAGCTAGAGTAAGTAGTTCGCCAGTTAATAGTTTGGCAACGTTGTTGCC  
ATTGCTGACGGCATCGTGGTGTACGCTCGTCTGTTGGTATGGCTTCATTCAGCTCCGGTTCCTAACGATCAAGGCGAGT  
TACATGATCCCCATGTTGTGCAAAAAGCGGTTAGCTCCTTCGGTCTCCGATCGTTGTCAGAAGTAAGTTGGCCGAG  
TGTATCACTCATGTTTATGGCAGCACTGCATAATTCTCTTACTGTGCATGCCATCCGTAAGATGCTTTTCTGTGACTGGT  
GAGTACTCAACCAAGTCATCTGAGAATAGTGTATGCGGCGACCGAGTTGCTCTTGGCCGCGTCAACACGGGATAATAC  
CGCGCCACATAGCAGAACCTTAAAGTGTCTCATCATTGGAAAACGTTCTTCGGGGCGAAAACCTCTCAAGGATCTTACCGC  
TGTTGAGATCCAGTTCGATGTAACCCACTCGTGCACCCAACTGATCTTCAGCATCTTTTACTTTTACCAGCGTTTTCGGG  
TGAGCAAAAACAGGAAGGCAAAATGCCGCAAAAAGGGAATAAGGGCGACCGGAAATGTTGAATACTCATACTCTTCCT  
TTTTCAATATATTGAAGCATTATCAGGGTTATTGTCTCATGAGCGGATACATATTTGAATGTATTTAGAAAAATAAAC  
AAATAGGGGTTCCGCGCACATTTCCCGAAAAGTGCCACCTGACGCTAAGAAAACCATTATATCATGACATTAACCTAT  
AAAAATAGGCGTATCACGAGGCCCTTTCGCTTCAAGAATT

Map and nucleotide sequence of pTHG.Donor for HDR-mediated editing of *EGFP* into *EBFP*. DNA sequences sharing identity to the target sequence in HEK.EGFP<sup>Tet<sup>O</sup>.KRAB</sup> cells are indicated in orange; AmpR,  $\beta$ -lactamase ampicillin resistance gene; ori, high-copy number ColE1 prokaryotic origin of replication; cPPT/CTS, central polypurine tract and central termination sequence of HIV-1. As reference, the nucleotide sequences corresponding to the EBFP fluoro-chrome (Thr-His-Gly) and the ssODNs are highlighted in blue and underlined, respectively.
